fraction of offspring with dysgenic ovaries

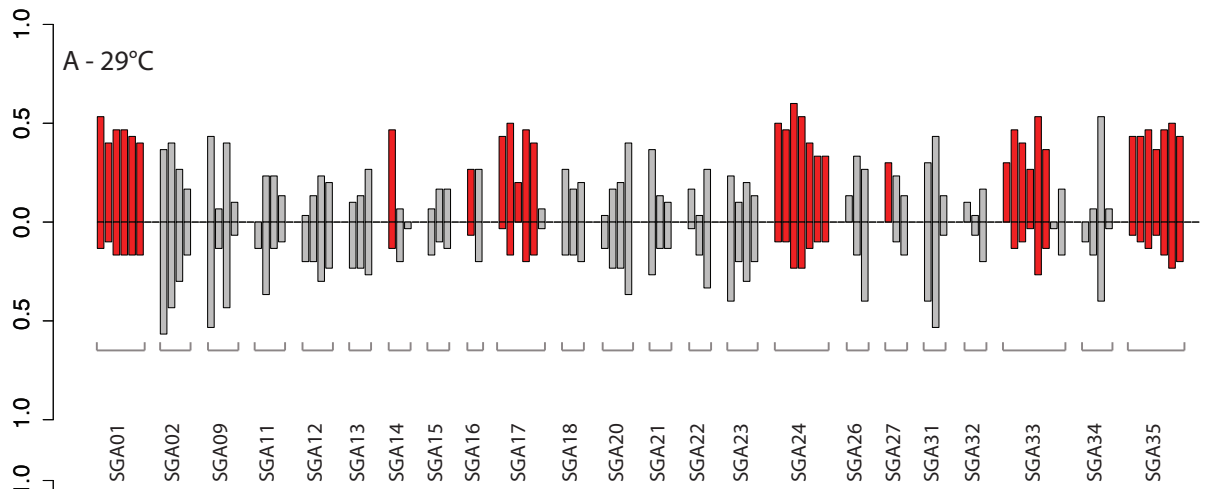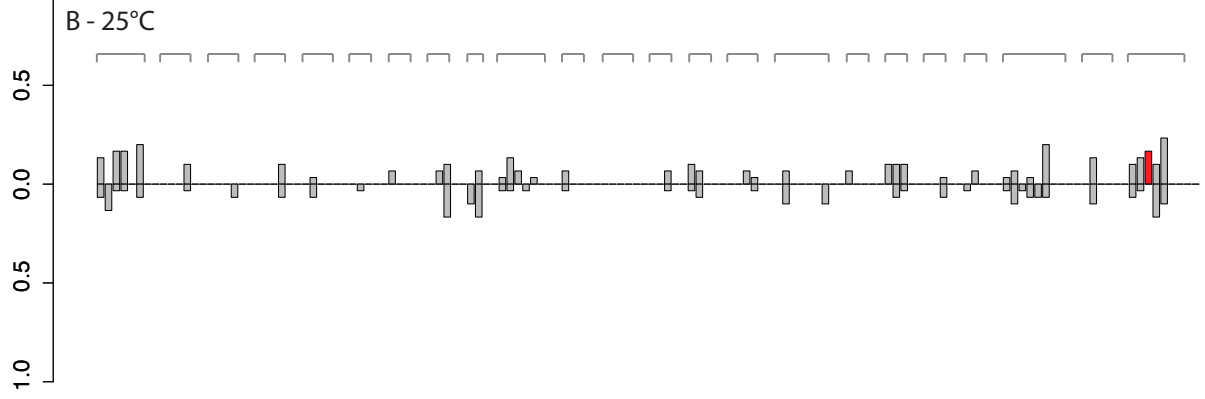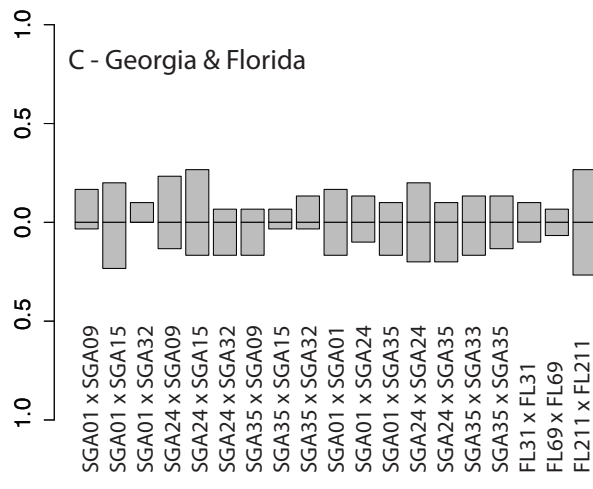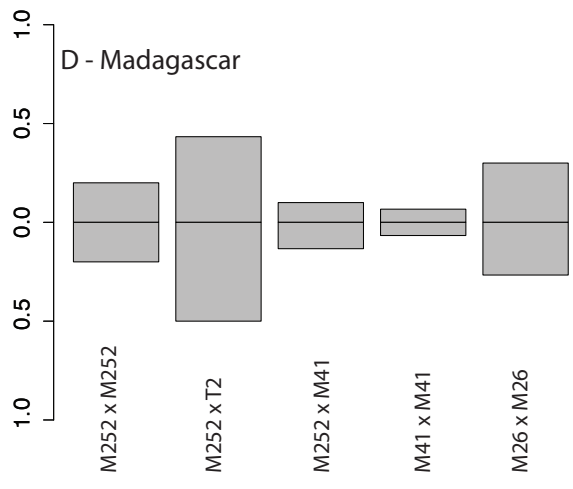

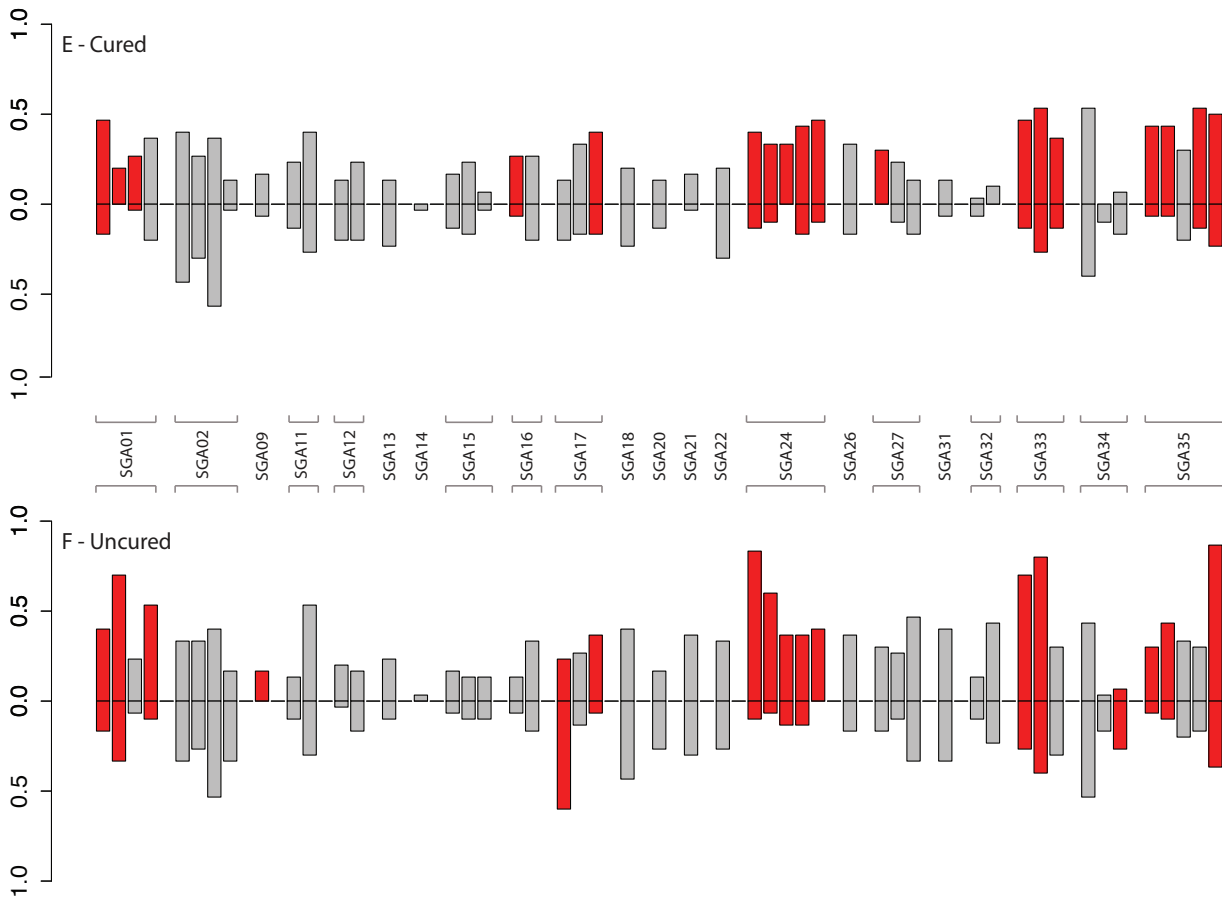

**Figure S2.** Hybrid dysgenic crosses and controls. Bar plots show the fraction of dysgenic offspring for both directions of each set of reciprocal crosses. Bars are coloured red when a significant difference between each reciprocal cross is found (Fisher's Exact Test,  $p < 0.05$ ). **A.** Initial crosses between Georgia (2009) and Madagascar (2004) flies at 29° C, with the fraction of dysgenic F1 females shown when the Georgia strain is paternal (positive direction) or maternal (negative direction). **B.** A subset of the crosses in panel A were repeated at 25° C, a non-dysgenic temperature in *D. melanogaster*; repeated crosses are shown in the same position as in panel A. **C.** Fraction of dysgenic offspring from crosses within and between Georgia and Florida lines at 29° C. The first strain named in the cross is the paternal strain in the positive direction and the maternal strain in the negative direction. **D.** Fraction of dysgenic offspring from crosses within and between Madagascar lines at 29° C. The first strain named in the cross is the paternal strain in the positive direction and the maternal strain in the negative direction. **E.** Fraction of dysgenic offspring from crosses between Georgia and Madagascar lines at 29C after curing of wolbachia with tetracycline hydrachloride for 2 generations. **F.** Fraction of dysgenic offspring from crosses between Georgia and Madagascar lines at 29C before curing.
