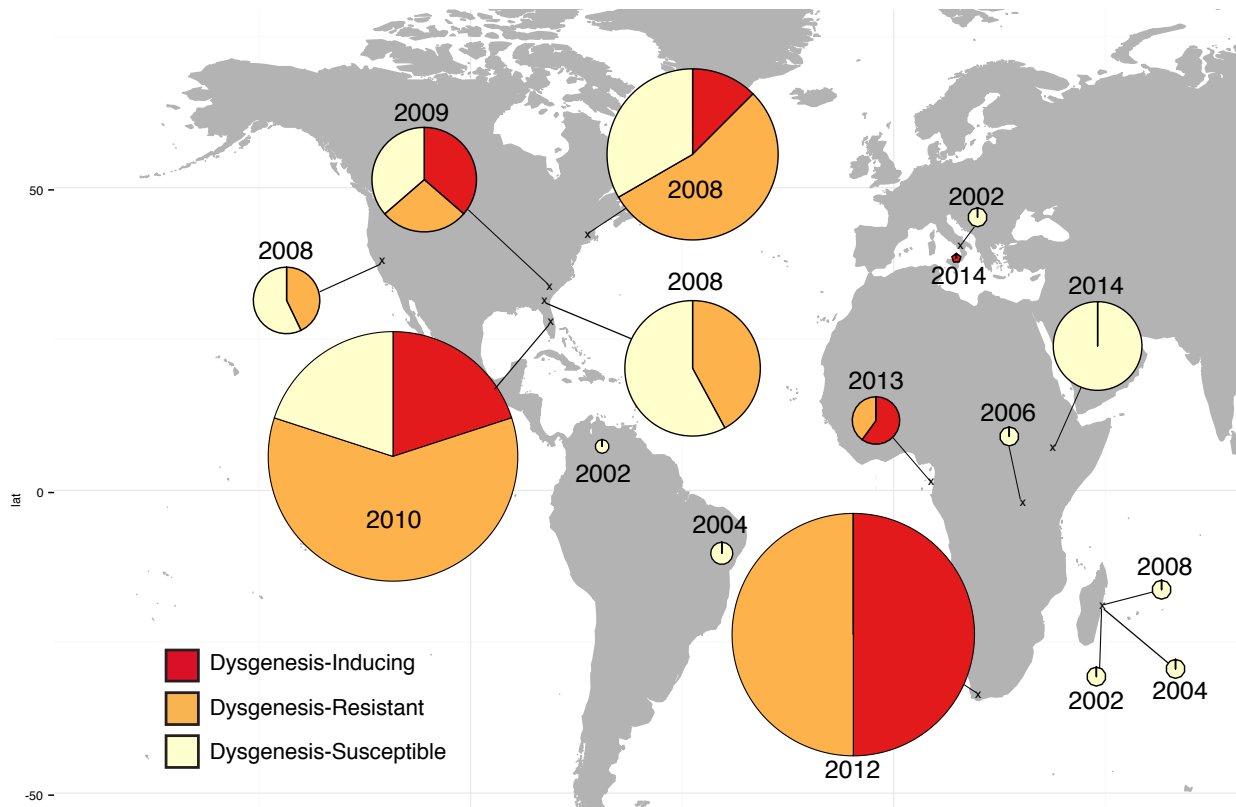

**Figure S3.** Map shows the approximate location where strains were collected; pie charts show the proportion of each population which were dysgenesis-inducing (red), dysgenesis-resistant (orange) and dysgenesis-susceptible (yellow). This summarizes the data given in Table 2. The area of the pie chart is proportional to the number of strains sampled.
