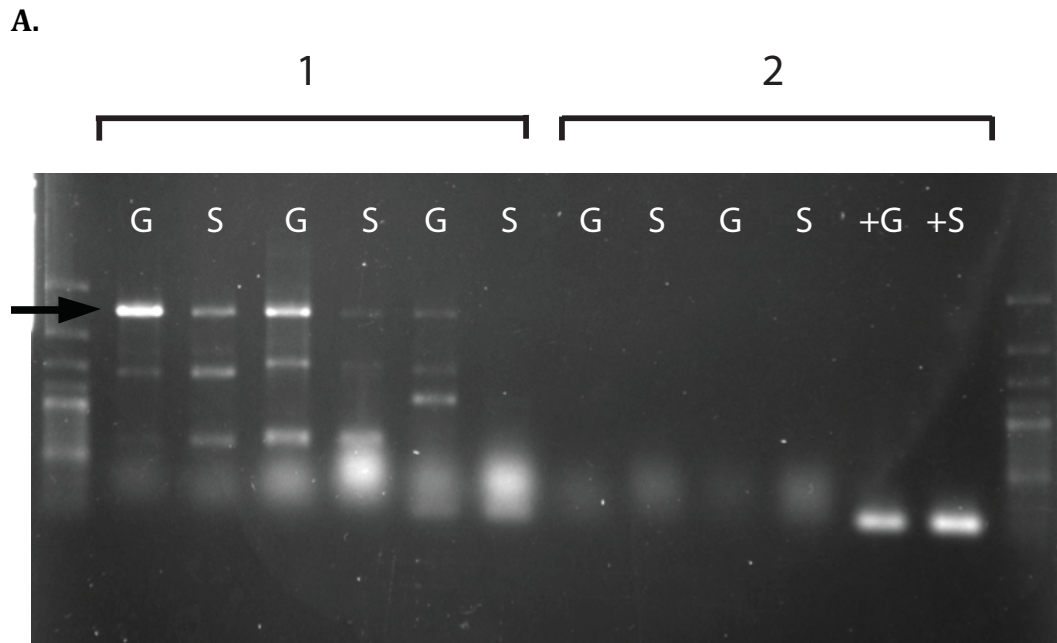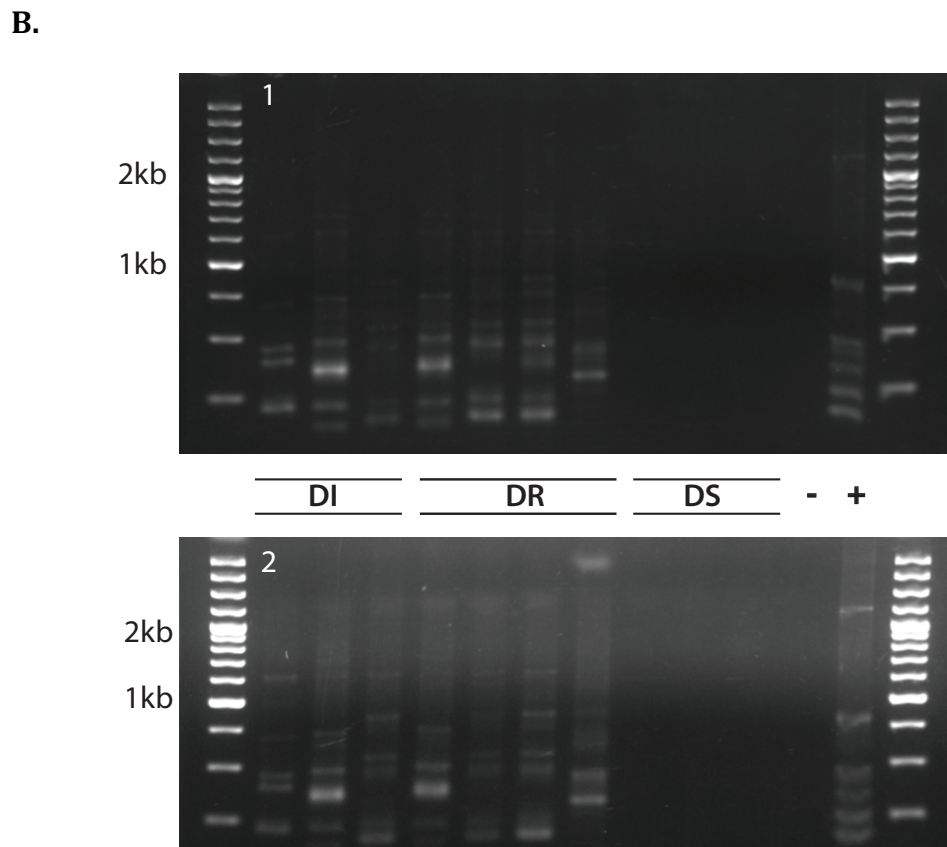

**Figure S7. A.** RT-PCR product from DI and DS lines. Group 1 consists of female flies from three DI lines roughly dissected into soma (S) and ovaries (G). The top band, at 2.6kb, corresponds to the expected size of the full-length P-element transcript after splicing. Group 2 consists of female flies from two DS lines with a positive control (*D. melanogaster* Harwich strain). **B.** PCR product from DI, DR & DS lines following reverse transcription with either forward (1) or reverse (2) primers.
