**Table S3.** Generalized linear model fit to the data on PCR presence/absence data. The model used fit the year and region from which strains were collect (see Supplementary Table 1), plus an interaction term, to the presence or absence of P-element in that strain, and used a binomial error model. (I.e, the call in R `glm(formula = cbind(present,absent) ~ year * region, family = "binomial")`)

|                                        | odds-ratio<br>estimate | std error | z      | p-value      |
|----------------------------------------|------------------------|-----------|--------|--------------|
| (Intercept)                            | -9.11E+02              | 1.75E+02  | -5.216 | 1.83E-07 *** |
| year                                   | 4.53E-01               | 8.68E-02  | 5.218  | 1.81E-07 *** |
| region(Americas)                       | -1.27E+03              | 4.76E+02  | -2.664 | 0.00772 **   |
| region(Europe)                         | -2.33E+02              | 2.24E+02  | -1.041 | 0.29799      |
| interaction year x<br>region(Americas) | 6.31E-01               | 2.37E-01  | 2.663  | 0.00773 **   |
| interaction year x<br>region(Europe)   | 1.16E-01               | 1.11E-01  | 1.045  | 0.29625      |

\*\*\*p<0.001, \*\*p<0.01
