**Table S4.** Primers used for identifying the presence or absence of P-element

| <b>Start position and direction</b> | <b>Sequence</b>               |
|-------------------------------------|-------------------------------|
| Exon0 – 94 forward                  | GGTTGTGTGCGGACGAATTTT         |
| Exon0 – 378 reverse                 | CTGGTTCAGGCTCTATCACTTT        |
| Exon1 – 615 forward                 | TCTACGCAAAATCTTCACGGAC        |
| Exon1 – 1144 reverse                | CTGATATACCGAGCTCTGTCCA        |
| Exon2 – 1241 forward                | TCCTGCAGATGACCATTTAAAGA       |
| Exon2 – 1900 reverse                | TTAAACTGCAGTGGAGTGGGAT        |
| Exon3 – 2181 forward                | GGACAACTCTGAAAGCTGGC          |
| Exon3 – 2545 reverse                | CGTTTCGCGCTGCTAATATTAA        |
| TIR – 3-31 forward & reverse        | TGATGAAATAACATAAGGTGGTCCCGTCG |
